# Supplementary material
Source: PubMed Central journal article supplement (PMC6764264)
Supplement: bloodBLD2019001366-suppl1.pdf [file bloodBLD2019001366-suppl1.pdf]

1 SUPPLEMENTAL INFORMATION

2  
3 **ROR1-Specific Cirmtuzumab Blocks ROR1-dependent Activation Of NF-κB And**  
4 **Thereby Suppresses STAT3 Stimulation In Chronic Lymphocytic Leukemia**  
5

6 Yun Chen<sup>1,2\*</sup>, Liguang Chen<sup>1\*</sup>, Jian Yu<sup>1</sup>, Emanuela M. Ghia<sup>1</sup>, Michael Y. Choi<sup>1</sup>, Ling Zhang<sup>1</sup>,  
7 Suping Zhang<sup>1,3</sup>, Elsa Sanchez-Lopez<sup>4</sup>, George F. Widhopf II<sup>1</sup>, Karen Messer<sup>1</sup>, Laura Z. Rassenti<sup>1</sup>,  
8 Catriona Jamieson<sup>1,5</sup> and Thomas J. Kipps<sup>1,3#</sup>

9 <sup>1</sup>Moores Cancer Center, University of California, San Diego; 3855 Health Sciences Dr., La Jolla,  
10 CA 92093-0820, USA

11 <sup>2</sup>Edmond H. Fischer Translational Medical Research Laboratory, Scientific Research Center, The  
12 Seventh Affiliated Hospital, Sun Yat-sen University, Shenzhen, 518107 Guangdong, China.

13 <sup>3</sup>Guangdong Key Laboratory for Genome Stability & Disease Prevention, Department of  
14 Pharmacology, International Cancer Center, Shenzhen University Health Science Center,  
15 Shenzhen, 518060 Guangdong, China.

16 <sup>4</sup>Departments of Pharmacology and Pathology, School of Medicine, University of California, San  
17 Diego

18 <sup>5</sup>Division of Regenerative Medicine, University of California, San Diego

19 #Correspondence: Moores Cancer Center, University of California, San Diego; 3855 Health  
20 Sciences Drive, Room 4307, La Jolla CA 92093-0820, USA. Phone: (858) 534-5400. Fax: (858)  
21 534-5620. E-mail: tkipps@ucsd.edu

22 \*These authors contributed equally to this work.

23 **Running title:** Targeting WNT5A/ROR1-Activation Of NF-κB In CLL

24

25 **Supplementary methods**

26 ***Materials***

27 Human recombinant IL-6 (7270-IL), IL-8 (208-IL), CCL2 (279-MC), CCL3 (270-LD), CCL4  
28 (271-BME), and CXCL1 (453-KC) were from R&D Systems (MN, USA). Anti-human IL6R  
29 (561696) and isotype control (555749) were from BD biosciences (CA, USA).

30 ***Tissue culture***

31 MEC1 was maintained in DMSO with 20% fetal bovine serum (FBS) in a humidified  
32 atmosphere at 37 °C with 5% CO<sub>2</sub>.

33 ***Knockout of IL6R in MEC1-ROR1***

34 Crispr/Cas9-mediated knockout was performed according to our previous publication.<sup>1</sup>  
35 gRNA sequence was GGAGGAAGCATGCTGGCCGTCGG on exon 1 of human *IL6R*.

36

37

38

39

40

41

42

43

44

### Supplemental Figure 1

45

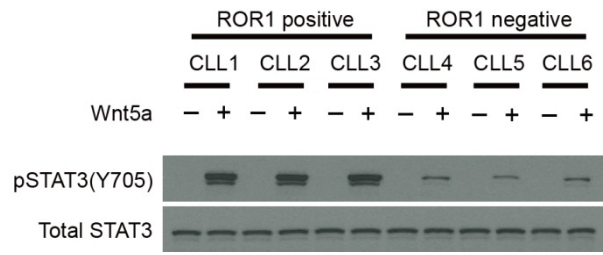

46

47

48

### Supplemental Figure 2

49

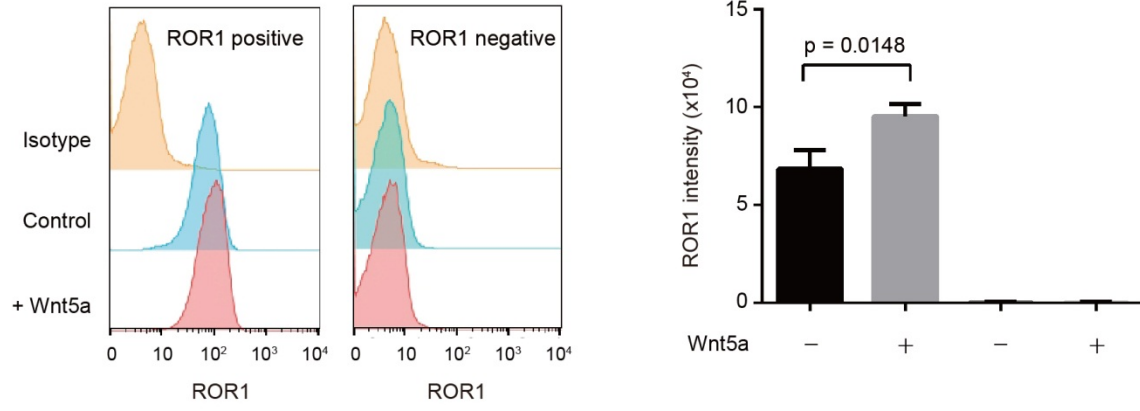

50

51

52

53

54

### Supplemental Figure 3

55

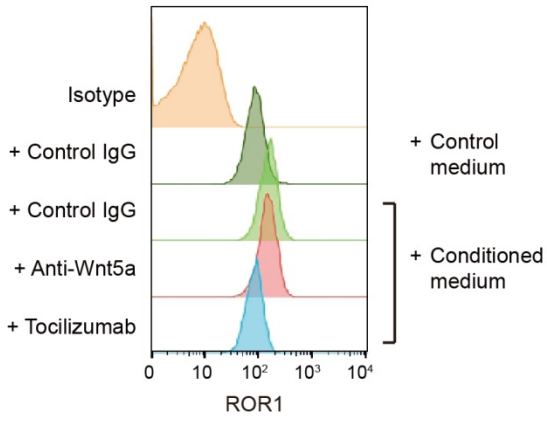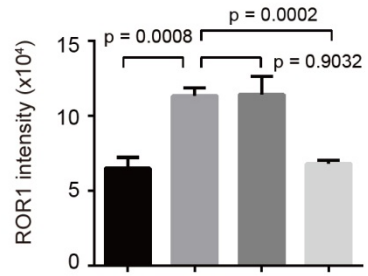

|                    |   |   |   |   |
|--------------------|---|---|---|---|
| Control medium     | + | - | - | - |
| Conditioned medium | - | + | + | + |
| Control IgG        | + | + | - | - |
| Anti-Wnt5a         | - | - | + | - |
| Tocilizumab        | - | - | - | + |

56

57

58

59

60

61

### Supplemental Figure 4

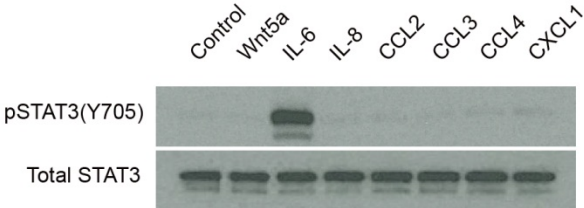

62

63

64

### Supplemental Figure 5

65

66

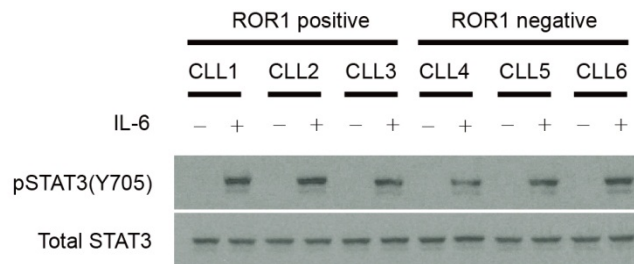

67

68

69

### Supplemental Figure 6

70

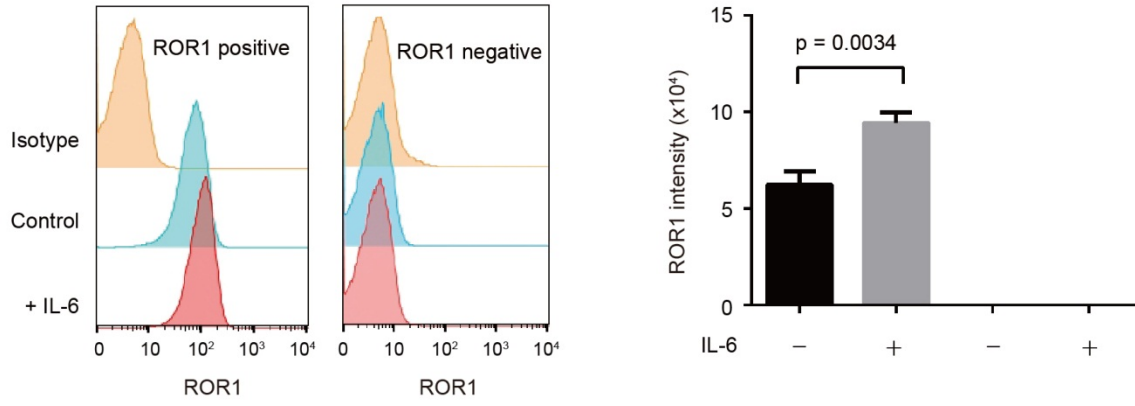

71

72



73

### Supplemental Figure 7

74

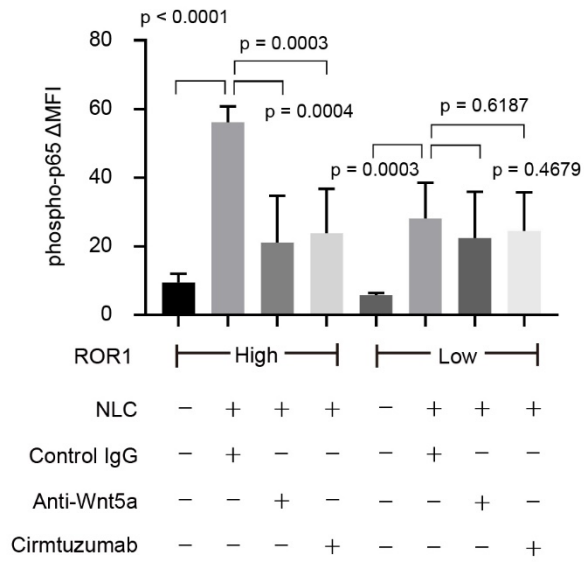

75

76

77

### Supplemental Figure 8

78

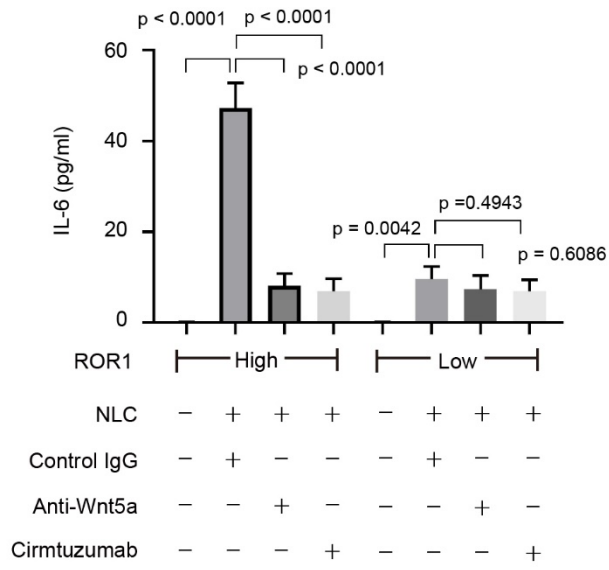

79

80

## Supplemental Figure 9

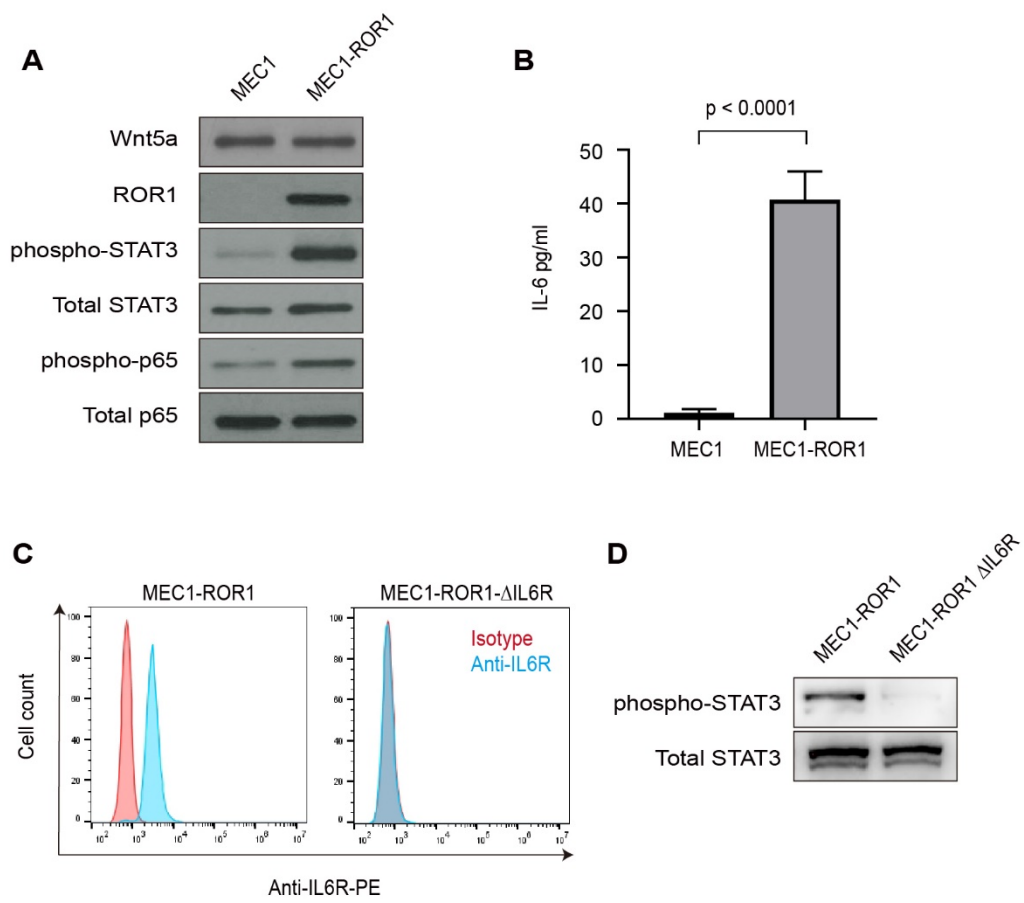

84

## Supplemental Figure 10

85

A

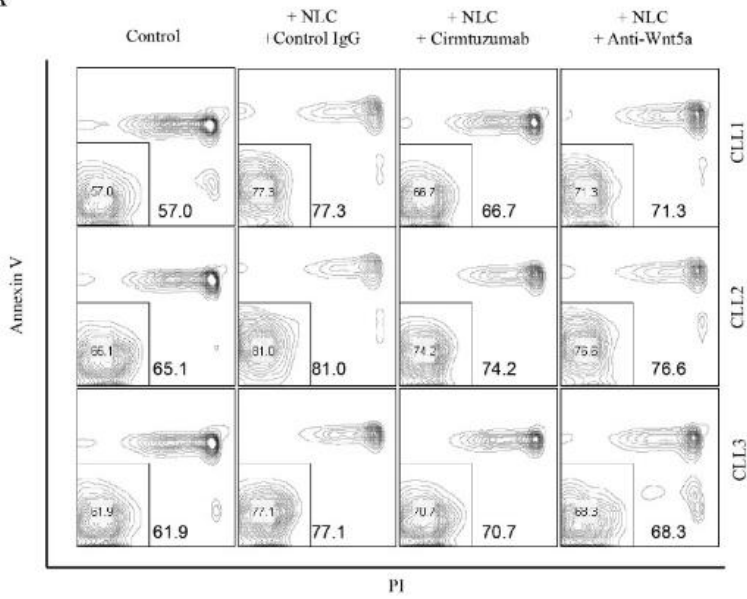

B

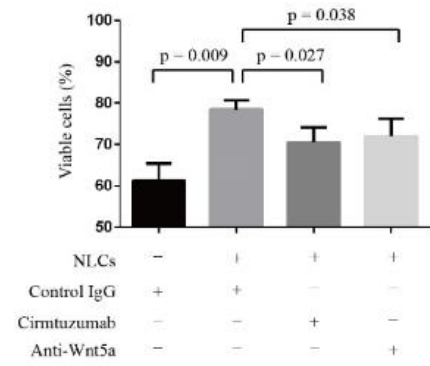

86

87

88

89

90

91

92

93

94

95

96

97

98

99

## Supplemental Table S1

|                            |             | ROR1( $\Delta$ MFI) |                     | phospho-stat3 ( $\Delta$ MFI) |                     | phospho-p65 ( $\Delta$ MFI) |                 |    |
|----------------------------|-------------|---------------------|---------------------|-------------------------------|---------------------|-----------------------------|-----------------|----|
| Sample ID                  | IGHV status | CD5highCXCR4dim     | CD5dim<br>CXCR4high | CD5highCXCR4dim               | CD5dim<br>CXCR4high | CD5highCXCR4dim             | CD5dimCXCR4high |    |
| <b>ROR1<sup>high</sup></b> | Patient 1   | Unmutated           | 40                  | 25                            | 79                  | 52                          | 16              | 21 |
|                            | Patient 2   | Unmutated           | 49                  | 33                            | 15                  | 12                          | 70              | 47 |
|                            | Patient 3   | Unmutated           | 59                  | 47                            | 39                  | 28                          | 83              | 54 |
|                            | Patient 4   | Mutated             | 51                  | 35                            | 25                  | 19                          | 88              | 68 |
|                            | Patient 5   | Unmutated           | 51                  | 35                            | 27                  | 18                          | 70              | 57 |
|                            | Patient 6   | Mutated             | 54                  | 42                            | 31                  | 17                          | 68              | 42 |
|                            | Patient 7   | Mutated             | 69                  | 56                            | 27                  | 16                          | 33              | 19 |
|                            | Patient 8   | Mutated             | 65                  | 43                            | 45                  | 28                          | 23              | 12 |
|                            | Patient 9   | Unmutated           | 42                  | 33                            | 25                  | 14                          | 70              | 17 |
|                            | Patient 10  | Mutated             | 61                  | 44                            | 29                  | 19                          | 95              | 66 |
|                            | Patient 11  | Mutated             | 66                  | 52                            | 42                  | 22                          | 72              | 59 |
|                            | Patient 12  | Mutated             | 64                  | 38                            | 29                  | 14                          | 78              | 54 |
| <b>ROR1<sup>low</sup></b>  | Patient 13  | Unmutated           | 26                  | 24                            | 14                  | 11                          | 43              | 32 |
|                            | Patient 14  | Unmutated           | 7                   | 8                             | 14                  | 7                           | 40              | 26 |
|                            | Patient 15  | Unmutated           | 8                   | 9                             | 14                  | 8                           | 52              | 46 |
|                            | Patient 16  | Unmutated           | 9                   | 6                             | 17                  | 9                           | 35              | 21 |
|                            | Patient 17  | Unmutated           | 8                   | 8                             | 10                  | 8                           | 39              | 23 |
|                            | Patient 18  | Unmutated           | 22                  | 10                            | 15                  | 8                           | 24              | 22 |
|                            | Patient 19  | Unmutated           | 8                   | 10                            | 17                  | 8                           | 50              | 28 |
|                            | Patient 20  | Mutated             | 5                   | 8                             | 11                  | 5                           | 32              | 17 |
|                            | Patient 21  | Mutated             | 8                   | 8                             | 17                  | 8                           | 47              | 22 |
|                            | Patient 22  | Mutated             | 26                  | 12                            | 8                   | 5                           | 21              | 15 |
|                            | Patient 23  | Mutated             | 12                  | 9                             | 15                  | 9                           | 33              | 22 |
|                            | Patient 24  | Mutated             | 22                  | 11                            | 16                  | 10                          | 31              | 22 |

103

104

105

106

**Supplemental Table S2**

107

**The plasma levels of IL-6 in patients treated by cirmtuzumab**

| Patient     | Pre-treatment<br>of IL-6 (pg/ml) | Post-treatment<br>of IL-6 (pg/ml) | Treatment      | sampling                                     |
|-------------|----------------------------------|-----------------------------------|----------------|----------------------------------------------|
| Patient #08 | 7.7                              | 0.2                               | 60 – 240 µg/kg | Two weeks after the 3 <sup>rd</sup> infusion |
| Patient #11 | 32.3                             | 26.2                              | 2 mg/kg        | One week after the only infusion             |
| Patient #04 | 5.7                              | 0.1                               | 2 mg/kg        | One week after the 2 <sup>nd</sup> infusion  |
| Patient #24 | 8.2                              | 1.1                               | 20 mg/kg       | Two weeks after the 3 <sup>rd</sup> infusion |
| Patient #28 | 27.3                             | 8.0                               | 20 mg/kg       | Two weeks after the 3 <sup>rd</sup> infusion |

108

109

110

## 111 **Supplementary Figure Legends**

112

113 **Supplemental Figure 1** Wnt5a Induces Phosphorylation Of STAT3 Via ROR1 In CLL  
114 Cells. The lysates of ROR1-positive or ROR1-negative CLL cells cultured overnight  
115 without or with Wnt5a (200 ng/ml) were examined by immunoblot analysis probed with  
116 anti-pSTAT3 (Y705) or anti-STAT3.

117

118 **Supplemental Figure 2** Wnt5a Induces Upregulation Of ROR1 In ROR1-positive CLL  
119 Cells. The expression level of ROR1 was analyzed by flow cytometry in ROR1-positive  
120 or ROR1-negative CLL cells with or without treatment of Wnt5a (200 ng/ml) for 16 hours.  
121 Bar histograms represent ROR1 intensity. Error bars indicate standard deviation about  
122 the mean (n = 3).

123

124 **Supplemental Figure 3** The Conditioned Medium Harvested From CLL-cell Cultured  
125 With Wnt5a Induced Upregulation Of ROR1 Via Wnt5a/ROR1 In CLL Cells. The  
126 expression level of ROR1 was analyzed by flow cytometry in CLL cells cultured with or  
127 without NLC in the presence of control IgG, anti-Wnt5a, or tocilizumab for 16 hours. Bars  
128 depict ROR1 intensities on each of the treated cell populations. Error bars provide the  
129 standard deviation about the mean (n = 3).

130

131 **Supplemental Figure 4** Exogenous Factors Can Induce STAT3 Activation In CLL Cells.  
132 CLL cells were treated for 30 minutes with Wnt5a (200 ng/ml), IL-6, IL-8, CCL2, CCL3,  
133 CCL4, or CXCL1 (each at 20 ng/ml). Phosphorylation of STAT3 was analyzed by

134 immunoblot analyses of lysates from treated CLL cells and probed with anti-pSTAT3 (top  
135 row) (Y705) or anti-STAT3 (bottom).

136

137 **Supplemental Figure 5** IL-6 Induces Phosphorylation Of STAT3 Independent Of ROR1  
138 In CLL Cells. Cell lysates of ROR1-positive or ROR1-negative CLL cells with or without  
139 treatment of IL-6 (20 ng/ml) for 30 minutes were examined by immunoblot analysis using  
140 anti-pSTAT3 (Y705) or anti-STAT3.

141

142 **Supplemental Figure 6** IL-6 Induced Upregulation Of ROR1 In ROR1-positive CLL Cells.  
143 The expression level of ROR1 was analyzed by flow cytometry in ROR1-positive or  
144 ROR1-negative CLL cells with or without treatment of IL-6 (20 ng/ml) for 16 hours. Bars  
145 represent the intensity of ROR1 staining for each of the treatment groups. Error bars  
146 indicate the standard deviation (n = 3).

147

148 **Supplemental Figure 7** NF- $\kappa$ B was activated in CLL cells co-cultured with NLC through  
149 Wnt5a/ROR1. Bar figures represent the intensity of phospho-p65 staining of CLL cells  
150 from ROR1<sup>high</sup> (n = 6) and ROR1<sup>low</sup> (n = 6) patients co-cultured with or without NLC for  
151 16 hours in the presence of control IgG, anti-Wnt5a, or cirmtuzumab. Error bars denote  
152 standard deviation.

153

154 **Supplemental Figure 8** The production of IL-6 was upregulated in CLL cells co-cultured  
155 with NLC through Wnt5a/ROR1. Bar figures represent the concentration of IL-6 in media  
156 of CLL cells from ROR1<sup>high</sup> (n = 6) and ROR1<sup>low</sup> (n = 6) patients co-cultured with or without



157 NLC for 16 hours in the presence of control IgG, anti-Wnt5a, or cirmtuzumab. Error bars  
158 denote standard deviation.

159  
160 **Supplemental Figure 9** STAT3 was activated in MEC1-ROR1 by the autocrine of IL-6.  
161 A. Immunoblot of lysates of MEC1 and MEC1-ROR1 with anti-Wnt5a, ROR1, pSTAT3,  
162 tSTAT3, pp65 or tp65 antibodies. B. ELISA of IL-6 in medium culturing MEC1 and MEC1-  
163 ROR1. Error bars denote standard deviation (n = 3). C. Flow cytometry analysis of MEC1-  
164 ROR1 and MEC1-ROR1- $\Delta$ IL6R with anti-IL6R-PE antibody. D. Immunoblot of lysates of  
165 MEC1-ROR1 and MEC1-ROR1- $\Delta$ IL6R with anti-pSTAT3 and tSTAT3.

166  
167 **Supplemental Figure 10** Wnt5a-induced ROR1-signaling Contributes To The Protective  
168 Effects Of NLC For CLL Cells *In Vitro*. A. Contour plots of CD5+CD19+ CLL cells stained  
169 with Annexin V and propidium iodide (PI) following culture with or without NLC control  
170 IgG, cirmtuzumab, or neutralizing antibody to Wnt5a, as indicated on top of the panel for  
171 data on CLL cells from 3 patients. The proportion of viable CLL cells that do not stain  
172 with Annexin V or PI is indicated in each panel. B. The mean percentages of viable CLL  
173 cells for all patient samples (N=3) cultured in each condition are provided by the histogram.  
174 The conditions are indicated at the bottom of the histograms. Error bars indicate the  
175 standard deviation about the mean. Statistical differences using Student T test with  
176 Bonferroni correction are indicated by the brackets.

177

178 **References**

- 179 1 Yu, J. et al. Wnt5a induces ROR1 to associate with 14-3-3zeta for enhanced  
180 chemotaxis and proliferation of chronic lymphocytic leukemia cells. *Leukemia* **31**,  
181 2608-2614, doi:10.1038/leu.2017.132 (2017).
